# Supplementary material
Source: publisher figshare collection journal article supplement (https://acs.figshare.com/ndownloader/files/26436519)

## Supporting Information 2

Figure. S1 Shannon curves (a), rank abundance (b).

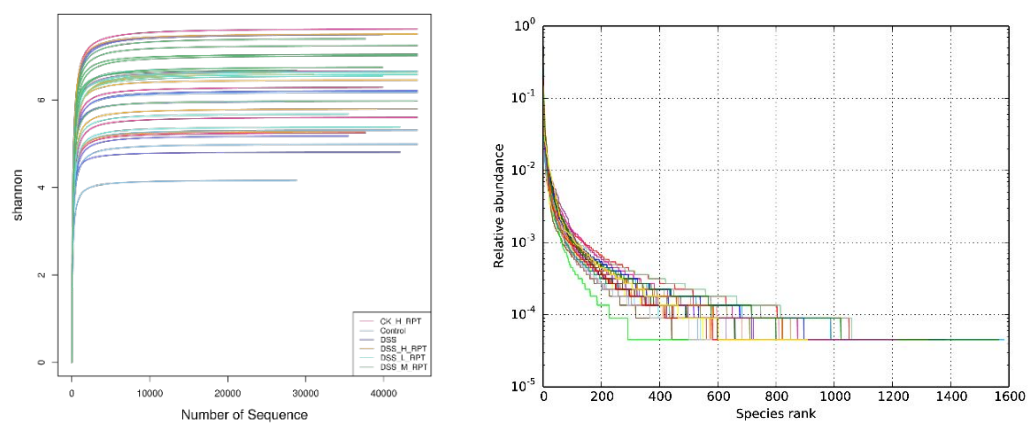

Figure S2. *E. Coli* was quantified using Q-PCR and quantity of DNA ( $\mu\text{g}$  of DNA)

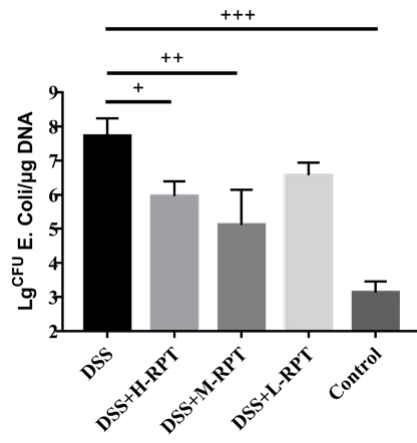

Supplement: Supplementary file 1 [file 26436519]
